# Supplementary material for: Bioconversion of Biomass-Derived Phenols Catalyzed by Myceliophthora thermophila Laccase
Source: PubMed Central journal article supplement (PMC6273956; doi:10.3390/molecules21050550), 2016-04-27
Supplement: molecules-21-00550-s001.pdf [file molecules-21-00550-s001.pdf]

# Supplementary Materials: Bioconversion of Biomass Derived Phenols Catalyzed by *Myceliophthora thermophila* Laccase

Anastasia Zerva, Nikolaos Manos, Stamatina Vouyiouka, Paul Christakopoulos, Evangelos Topakas

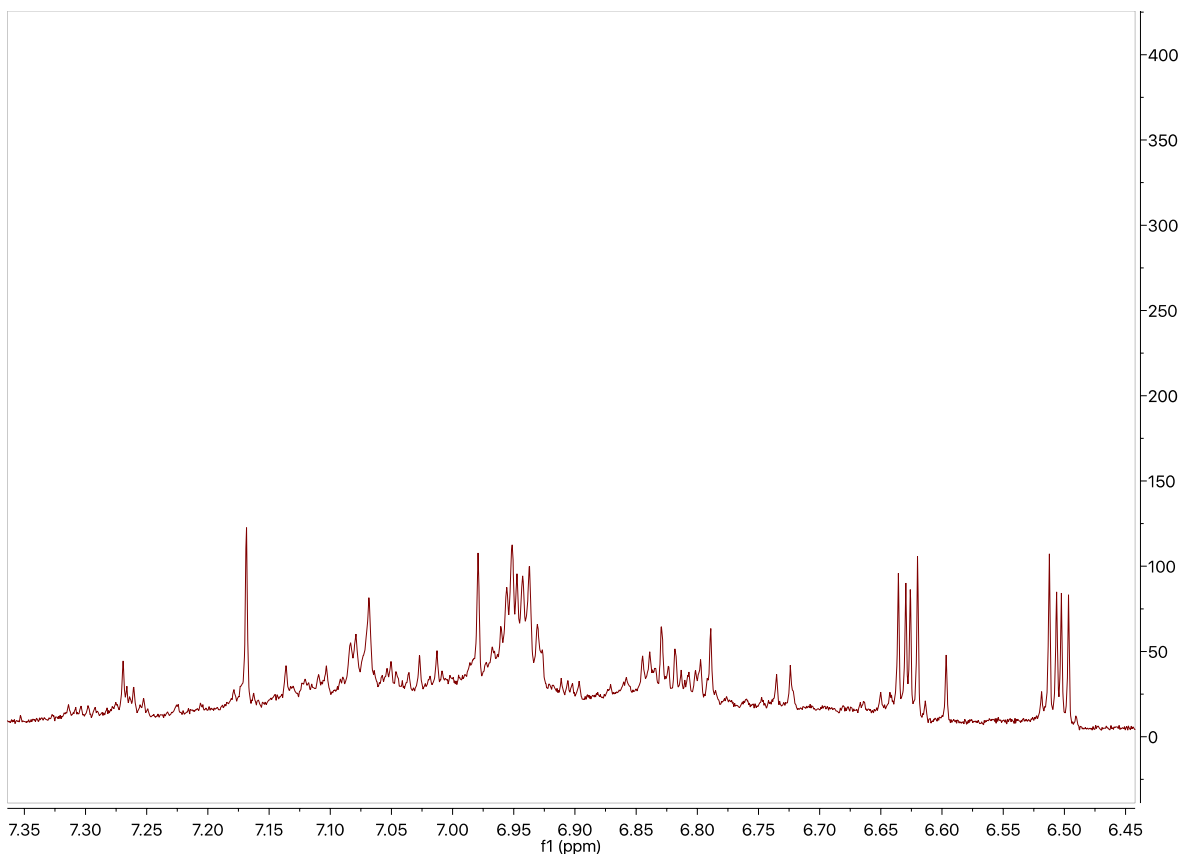

**Figure S1.** <sup>1</sup>H-NMR spectrum of polycatechol.

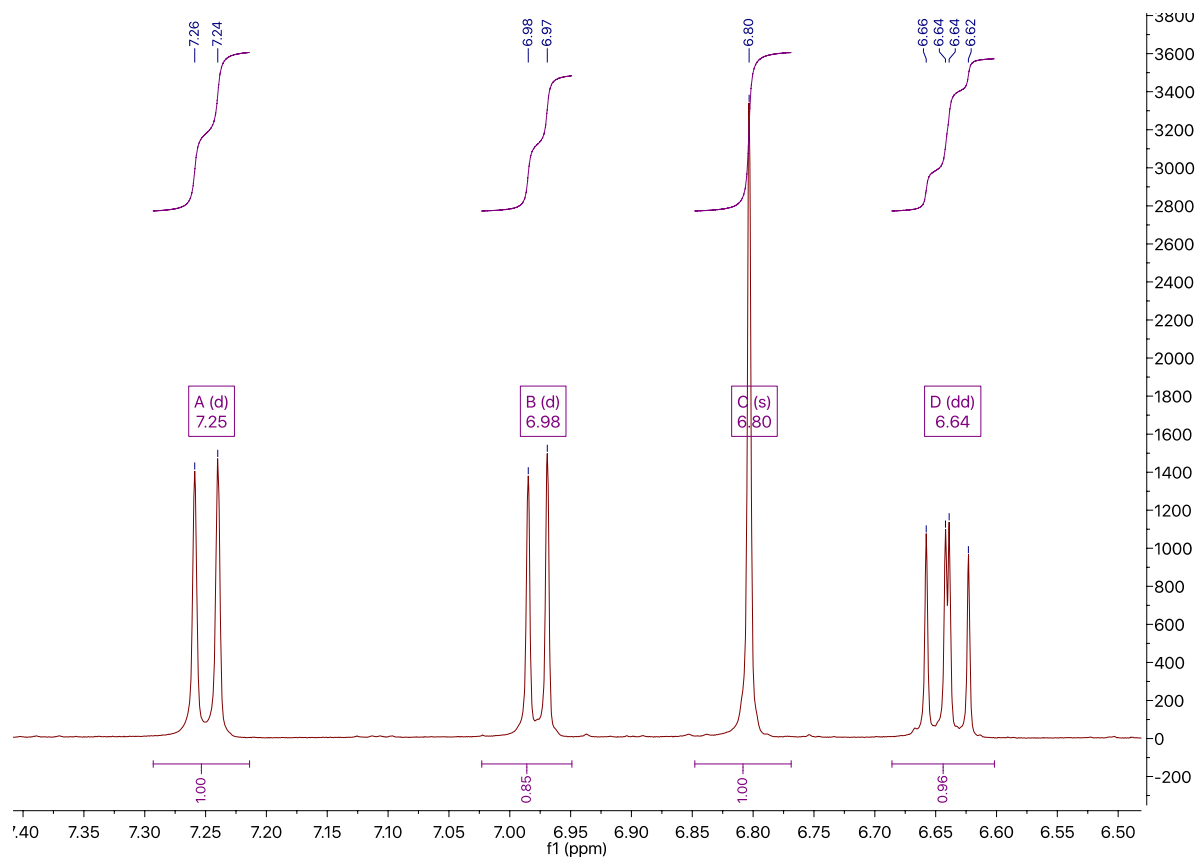

**Figure S2.**  $^1\text{H-NMR}$  spectrum of purpurogallin.

**Table S1.** Results of GPC and solution viscosity measurements for laccase-synthesized polycatechol and poly(gallic acid).

|                   | $\overline{M}_n$ (Da) | $\overline{M}_w$ (Da) | PDI  | IV ( $\text{dL g}^{-1}$ ) |
|-------------------|-----------------------|-----------------------|------|---------------------------|
| Polycatechol      | 1700                  | 26240                 | 15.4 | $0.102 \pm 0.013$         |
| Poly(gallic acid) | 2160                  | 7600                  | 3.5  | $0.058 \pm 0.002$         |
